# Supplementary material for: Aqueous biphasic systems composed of a water-stable ionic liquid + carbohydrates and their applications
Source: Royal Society of Chemistry journal article supplement (doi:10.1039/c1gc15110j), 2011-01-01
Supplement: c1gc15110j.pdf [file c1gc15110j.pdf]

## Supporting Information

### **Aqueous Biphasic Systems Composed of a Water Stable Ionic Liquid + Carbohydrates and their Applications**

Mara G. Freire<sup>a,b\*</sup>, Cláudia L. S. Louros<sup>a</sup>, Luís Paulo N. Rebelo<sup>b</sup> and João A. P.  
Coutinho<sup>a\*</sup>

<sup>a</sup>Departamento de Química, CICECO, Universidade de Aveiro, 3810-193  
Aveiro, Portugal

<sup>b</sup>Instituto de Tecnologia Química e Biológica, [www.itqb.unl.pt](http://www.itqb.unl.pt), UNL, Av.  
República, Apartado 127, 2780-901 Oeiras, Portugal

\*Corresponding author

Tel: +351-234-370200; Fax: +351-234-370084; E-mail address:  
[maragfreire@ua.pt](mailto:maragfreire@ua.pt); [jcoutinho@ua.pt](mailto:jcoutinho@ua.pt)

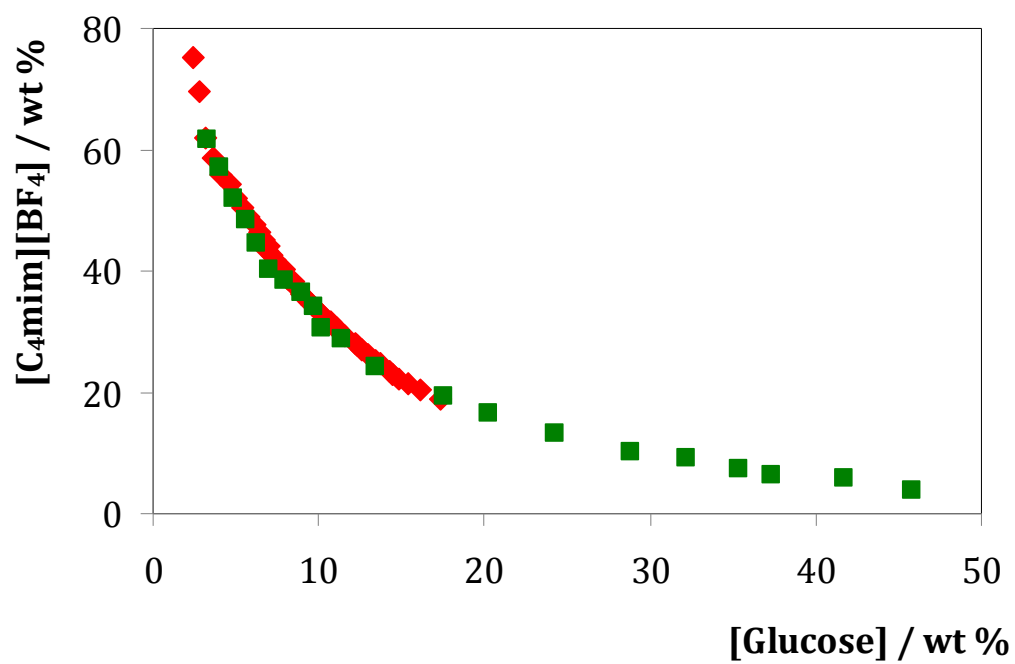

**Fig. S1** Phase diagram for [C<sub>4</sub>mim][BF<sub>4</sub>] + D-glucose + water system at 298 K : (□) literature data<sup>30</sup>; (♦) this work.

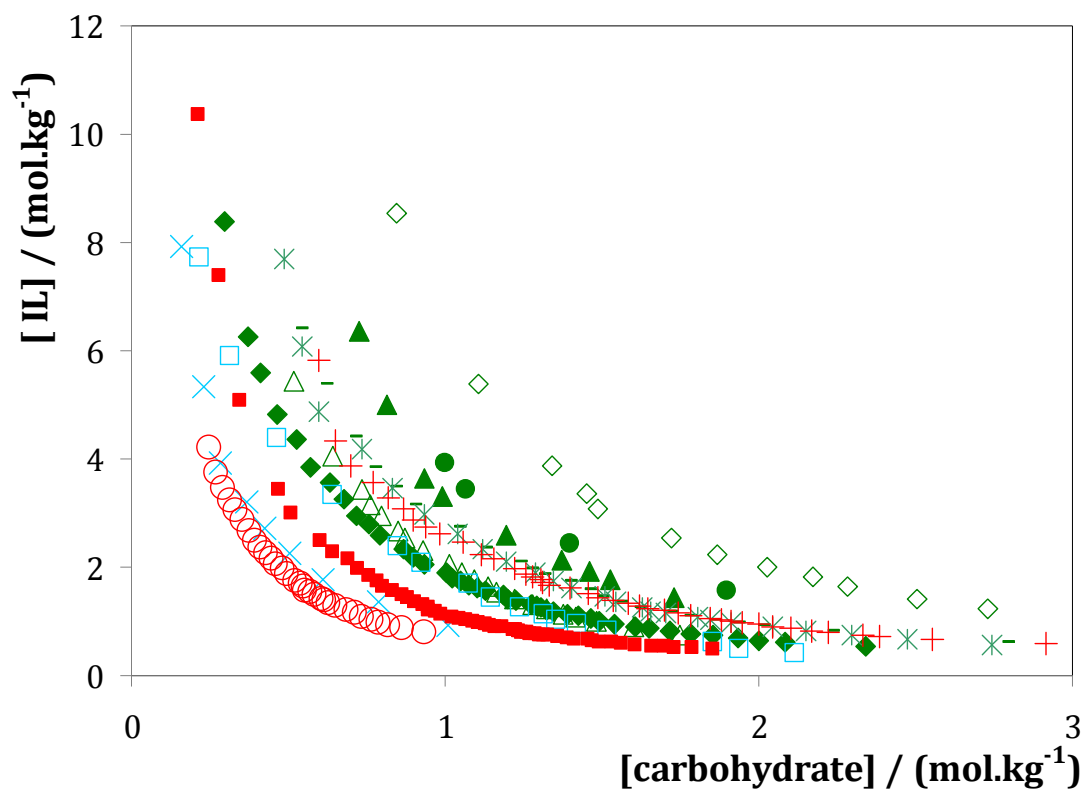

**Fig. S2** Phase diagrams for the ternary systems composed by  $[C_4mim][CF_3SO_3]$  + carbohydrate +  $H_2O$  at 298 K: ( $\blacklozenge$ ) D-(+)-glucose; ( $\triangle$ ) D-(+)-galactose; ( $*$ ) D-(-)-fructose; (-) D-(+)-mannose; ( $\blacktriangle$ ) D-(-)-arabinose; ( $\bullet$ ) L-(+)-arabinose; ( $\diamond$ ) D-(+)-xylose; ( $\times$ ) D-(+)-maltose; ( $\square$ ) sucrose; ( $\circ$ ) D-maltitol; ( $\blacksquare$ ) D-sorbitol; (+) xylitol.

Monosacharides: green; Dissacharides: blue; Polyols: red.

**Table S1** Experimental binodal curve mass fraction data for the system [C<sub>4</sub>mim][BF<sub>4</sub>]  
(1) + D-glucose (2) + H<sub>2</sub>O (3) at 298 K

| [C <sub>4</sub> mim][BF <sub>4</sub> ] + D-glucose |                    |                    |                    |                    |                    |
|----------------------------------------------------|--------------------|--------------------|--------------------|--------------------|--------------------|
| 100 w <sub>1</sub>                                 | 100 w <sub>2</sub> | 100 w <sub>1</sub> | 100 w <sub>2</sub> | 100 w <sub>1</sub> | 100 w <sub>2</sub> |
| 75.2490                                            | 2.3881             | 42.6559            | 7.2106             | 29.3483            | 11.5547            |
| 69.5549                                            | 2.7588             | 41.7287            | 7.3923             | 28.1486            | 12.2326            |
| 61.9341                                            | 3.1640             | 40.1697            | 7.9731             | 27.6645            | 12.3563            |
| 58.6109                                            | 3.6582             | 38.8417            | 8.1598             | 26.9900            | 12.6071            |
| 55.7919                                            | 4.1364             | 38.1173            | 8.4512             | 26.1826            | 12.9443            |
| 54.3738                                            | 4.6568             | 37.0907            | 8.6863             | 25.2259            | 13.4309            |
| 51.8934                                            | 4.9979             | 36.2404            | 8.9089             | 24.6248            | 13.7502            |
| 50.3331                                            | 5.4134             | 34.9962            | 9.3866             | 23.4952            | 14.2296            |
| 48.7944                                            | 5.8286             | 34.2781            | 9.5627             | 22.9090            | 14.4825            |
| 47.5904                                            | 6.1589             | 33.1269            | 10.0651            | 22.2102            | 14.8670            |
| 46.4157                                            | 6.4488             | 32.5508            | 10.3047            | 21.3839            | 15.3856            |
| 45.1486                                            | 6.7504             | 31.5326            | 10.7079            | 20.2697            | 16.1556            |
| 43.9957                                            | 6.9891             | 30.6353            | 11.1175            | 18.7835            | 17.3431            |
| 43.3360                                            | 6.9321             | 30.0518            | 11.2224            |                    |                    |

**Table S2** Experimental binodal curve mass fraction data for the system  
[C<sub>4</sub>mim][CF<sub>3</sub>SO<sub>3</sub>] (1) + D-glucose/D-(+)-mannose (2) + H<sub>2</sub>O (3) at 298 K

| D-glucose          |                    | D-(+)-mannose      |                    |                    |                    |
|--------------------|--------------------|--------------------|--------------------|--------------------|--------------------|
| 100 w <sub>1</sub> | 100 w <sub>2</sub> | 100 w <sub>1</sub> | 100 w <sub>2</sub> | 100 w <sub>1</sub> | 100 w <sub>2</sub> |
| 70.7134            | 5.0360             | 28.3764            | 18.0857            | 64.8760            | 8.6316             |
| 64.3492            | 6.2705             | 27.5034            | 18.6608            | 60.8706            | 9.8346             |
| 61.7235            | 6.9267             | 27.0186            | 18.8968            | 56.0231            | 11.1787            |
| 58.1970            | 7.7439             | 26.4837            | 19.0622            | 52.5818            | 12.0626            |
| 55.7481            | 8.6443             | 25.9630            | 19.2585            | 50.0435            | 12.9785            |
| 52.6220            | 9.3564             | 25.3938            | 19.5034            | 47.7135            | 13.8156            |
| 50.6149            | 10.2228            | 24.5757            | 20.0296            | 44.1636            | 15.6639            |
| 48.4233            | 10.8946            | 23.9266            | 20.4443            | 40.5916            | 16.7527            |
| 45.9950            | 11.4381            | 23.1254            | 20.8964            | 37.6191            | 18.0734            |
| 44.5421            | 11.9688            | 22.3935            | 21.1928            | 36.2642            | 18.5303            |
| 42.6894            | 12.4911            | 21.4186            | 21.7287            | 35.0096            | 19.0113            |
| 40.2582            | 13.5371            | 20.7408            | 22.4421            | 33.5765            | 19.9550            |
| 38.6869            | 13.9254            | 20.0030            | 22.9040            | 31.4894            | 20.6602            |
| 37.2662            | 14.3704            | 19.1299            | 23.6147            | 29.8256            | 21.1205            |
| 35.3999            | 15.3018            | 18.3079            | 24.3028            | 28.1054            | 21.8247            |
| 34.2066            | 15.5314            | 17.4040            | 25.0572            | 26.6704            | 22.4546            |
| 33.3388            | 15.8956            | 16.6407            | 25.8189            | 25.4045            | 23.5145            |
| 32.5622            | 16.2527            | 15.7532            | 26.4985            | 24.0254            | 24.1517            |
| 31.7911            | 16.5735            | 15.0095            | 27.2795            | 22.9965            | 24.9679            |
| 31.0485            | 16.9157            | 13.3303            | 29.6538            | 22.0136            | 25.7172            |
| 30.0063            | 17.6089            |                    |                    | 21.1057            | 26.4960            |
| 28.9851            | 17.7711            |                    |                    | 18.9369            | 28.5630            |

**Table S3** Experimental binodal curve mass fraction data for the system  
 [C<sub>4</sub>mim][CF<sub>3</sub>SO<sub>3</sub>] (1) + D-(-)-fructose/D-(+)-galactose/D-(+)-xylose (2) + H<sub>2</sub>O (3) at  
 298 K

| D-(-)-fructose            |                           | D-(+)-galactose           |                           | D-(+)-xylose              |                           |
|---------------------------|---------------------------|---------------------------|---------------------------|---------------------------|---------------------------|
| 100 <i>w</i> <sub>1</sub> | 100 <i>w</i> <sub>1</sub> | 100 <i>w</i> <sub>1</sub> | 100 <i>w</i> <sub>2</sub> | 100 <i>w</i> <sub>1</sub> | 100 <i>w</i> <sub>2</sub> |
| 68.9467                   | 8.0801                    | 61.0577                   | 8.5350                    | 71.1398                   | 11.2673                   |
| 63.6435                   | 8.9467                    | 53.9164                   | 10.3804                   | 60.7959                   | 14.2226                   |
| 58.3851                   | 9.7308                    | 49.8546                   | 11.6739                   | 52.7070                   | 16.7697                   |
| 54.5921                   | 11.6780                   | 47.6505                   | 12.0803                   | 49.1522                   | 17.9019                   |
| 49.8797                   | 13.0415                   | 45.8982                   | 12.5601                   | 47.0747                   | 18.2635                   |
| 46.1916                   | 14.4036                   | 43.4384                   | 13.3009                   | 42.3666                   | 20.5517                   |
| 43.0229                   | 15.7833                   | 42.1389                   | 13.5979                   | 39.2347                   | 21.9157                   |
| 40.2790                   | 16.7873                   | 39.8369                   | 14.3225                   | 36.4560                   | 23.3348                   |
| 37.6280                   | 17.7031                   | 37.2042                   | 15.4268                   | 34.2809                   | 24.5801                   |
| 35.4204                   | 18.8136                   | 35.3321                   | 15.9414                   | 32.0368                   | 25.5128                   |
| 33.5158                   | 19.4949                   | 33.6419                   | 16.4526                   | 28.8826                   | 27.3117                   |
| 31.7617                   | 20.1944                   | 32.0630                   | 16.9974                   | 26.1274                   | 29.0555                   |
| 29.8094                   | 21.3719                   | 30.7531                   | 17.3317                   | 23.0186                   | 31.3867                   |
| 28.2085                   | 21.7662                   | 29.0297                   | 18.0390                   |                           |                           |
| 26.5023                   | 22.6867                   | 27.4236                   | 18.7043                   |                           |                           |
| 25.4550                   | 22.9797                   | 26.0478                   | 19.2676                   |                           |                           |
| 24.8501                   | 23.5064                   | 24.7474                   | 19.8680                   |                           |                           |
| 23.7681                   | 24.5648                   | 23.6037                   | 20.3399                   |                           |                           |
| 22.8142                   | 24.9480                   | 22.2887                   | 21.0732                   |                           |                           |
| 21.7663                   | 25.6070                   | 20.3385                   | 22.3792                   |                           |                           |
| 20.4033                   | 26.9138                   | 17.6472                   | 23.9326                   |                           |                           |
| 18.9587                   | 27.9261                   |                           |                           |                           |                           |
| 17.4808                   | 29.2785                   |                           |                           |                           |                           |
| 16.0741                   | 30.8295                   |                           |                           |                           |                           |
| 14.2251                   | 33.0768                   |                           |                           |                           |                           |
| 11.9355                   | 36.5251                   |                           |                           |                           |                           |

**Table S4** Experimental binodal curve mass fraction data for the system  
[C<sub>4</sub>mim][CF<sub>3</sub>SO<sub>3</sub>] (1) + D-(-)-arabinose/L-(+)-arabinose (2) + H<sub>2</sub>O (3) at 298 K

| D-(-)-arabinose    |                    | L-(+)-arabinose    |                    |
|--------------------|--------------------|--------------------|--------------------|
| 100 w <sub>1</sub> | 100 w <sub>2</sub> | 100 w <sub>1</sub> | 100 w <sub>2</sub> |
| 64.7475            | 9.8217             | 53.0112            | 13.0506            |
| 58.9833            | 10.8809            | 49.7286            | 13.7781            |
| 51.1611            | 12.3168            | 41.3169            | 17.3279            |
| 48.7887            | 12.9662            | 31.1939            | 22.1602            |
| 42.6944            | 15.2084            |                    |                    |
| 38.0847            | 17.0765            |                    |                    |
| 35.6884            | 17.9848            |                    |                    |
| 33.7642            | 18.6584            |                    |                    |
| 29.3007            | 20.6024            |                    |                    |

**Table S5** Experimental binodal curve mass fraction data for the system  
[C<sub>4</sub>mim][CF<sub>3</sub>SO<sub>3</sub>] (1) + D-(+)-maltose/sucrose (2) + H<sub>2</sub>O (3) at 298 K

| D-(+)-maltose      |                    | Sucrose            |                    |
|--------------------|--------------------|--------------------|--------------------|
| 100 w <sub>1</sub> | 100 w <sub>2</sub> | 100 w <sub>1</sub> | 100 w <sub>2</sub> |
| 69.5833            | 5.4159             | 69.0111            | 6.9727             |
| 60.5713            | 7.6414             | 62.9178            | 9.6922             |
| 53.1283            | 9.2487             | 55.8468            | 13.7444            |
| 47.9283            | 11.6266            | 49.0755            | 18.0295            |
| 43.8680            | 13.2972            | 40.6110            | 22.5122            |
| 39.3385            | 15.3948            | 37.3817            | 24.0722            |
| 33.9215            | 18.0742            | 32.6833            | 26.8783            |
| 28.0830            | 22.0657            | 29.2788            | 28.1849            |
| 21.0720            | 26.6296            | 26.7533            | 29.7459            |
|                    |                    | 24.4932            | 30.9950            |
|                    |                    | 22.8698            | 31.6668            |
|                    |                    | 21.2735            | 32.6877            |
|                    |                    | 19.2559            | 34.1996            |
|                    |                    | 14.9677            | 38.7963            |
|                    |                    | 12.4765            | 39.8776            |
|                    |                    | 10.6171            | 41.9749            |



**Table S6** Experimental binodal curve mass fraction data for the system  
[C<sub>4</sub>mim][CF<sub>3</sub>SO<sub>3</sub>] (1) + D-sorbitol (2) + H<sub>2</sub>O (3) at 298 K

| D-sorbitol |           |           |           |           |           |
|------------|-----------|-----------|-----------|-----------|-----------|
| 100 $w_1$  | 100 $w_2$ | 100 $w_1$ | 100 $w_2$ | 100 $w_1$ | 100 $w_2$ |
| 74.9096    | 3.7490    | 23.6560   | 15.7227   | 18.7622   | 18.4855   |
| 68.0337    | 4.7991    | 23.1053   | 15.9685   | 18.5298   | 18.6713   |
| 59.4219    | 5.9384    | 22.6068   | 16.2423   | 18.3222   | 18.7914   |
| 49.7353    | 7.8828    | 22.2587   | 16.5272   | 18.0880   | 19.0002   |
| 46.3405    | 8.4806    | 21.7839   | 16.7670   | 17.8703   | 19.1659   |
| 41.8341    | 9.8748    | 21.4098   | 17.0359   | 17.6702   | 19.3176   |
| 39.7041    | 10.4579   | 25.8859   | 14.6851   | 17.4579   | 19.4900   |
| 38.2130    | 11.1464   | 25.1886   | 14.9844   | 17.0771   | 19.8455   |
| 36.2173    | 11.6004   | 24.4093   | 15.2615   | 16.6846   | 20.1980   |
| 34.7903    | 12.0948   | 23.6560   | 15.7227   | 16.3265   | 20.4439   |
| 33.2935    | 12.4954   | 23.1053   | 15.9685   | 16.0123   | 20.9377   |
| 32.0710    | 12.7241   | 22.6068   | 16.2423   | 15.6536   | 21.1152   |
| 31.0922    | 13.1690   | 22.2587   | 16.5272   | 15.3313   | 21.3402   |
| 30.1590    | 13.5795   | 21.7839   | 16.7670   | 14.9462   | 21.8136   |
| 29.1104    | 13.8461   | 21.4098   | 17.0359   | 14.5243   | 22.1686   |
| 28.0745    | 14.1190   | 21.0254   | 17.1890   | 14.0973   | 22.6234   |
| 27.2552    | 14.4588   | 20.7149   | 17.4249   | 13.6865   | 23.2004   |
| 26.4981    | 14.7233   | 20.4010   | 17.7108   | 13.3420   | 23.6259   |
| 25.8859    | 14.6851   | 19.8448   | 18.1507   | 12.9988   | 23.9657   |
| 25.1886    | 14.9844   | 19.4900   | 18.2379   | 12.6596   | 24.5508   |
| 24.4093    | 15.2615   | 19.1269   | 18.3398   | 12.2026   | 25.2312   |

**Table S7** Experimental binodal curve mass fraction data for the system  
[C<sub>4</sub>mim][CF<sub>3</sub>SO<sub>3</sub>] (1) + xylitol (2) + H<sub>2</sub>O (3) at 298 K

| xylitol            |                    |                    |                    |
|--------------------|--------------------|--------------------|--------------------|
| 100 w <sub>1</sub> | 100 w <sub>2</sub> | 100 w <sub>1</sub> | 100 w <sub>2</sub> |
| 62.6714            | 8.3585             | 29.4471            | 18.4590            |
| 55.5502            | 9.0249             | 28.6101            | 18.9560            |
| 52.7933            | 9.6272             | 27.8868            | 19.4053            |
| 50.7670            | 10.4605            | 27.0447            | 19.7795            |
| 48.5804            | 11.0805            | 25.7138            | 20.5290            |
| 47.0210            | 11.6472            | 25.0842            | 20.9759            |
| 45.3914            | 12.0493            | 24.3019            | 21.3390            |
| 44.1771            | 12.5082            | 23.3643            | 21.9166            |
| 42.8884            | 13.0232            | 22.9169            | 22.2519            |
| 41.4088            | 13.8610            | 22.3911            | 22.5256            |
| 39.1433            | 14.4843            | 21.8361            | 22.8375            |
| 38.1662            | 14.9427            | 21.2886            | 23.3252            |
| 36.2432            | 15.6894            | 20.7119            | 23.7061            |
| 35.1609            | 16.0345            | 19.9608            | 24.2377            |
| 34.3984            | 16.2903            | 19.2521            | 24.8227            |
| 33.7361            | 16.5732            | 18.5856            | 25.2703            |
| 33.2149            | 16.6177            | 17.7810            | 26.1869            |
| 32.6062            | 16.8379            | 17.2505            | 26.6424            |
| 31.6116            | 17.5384            | 16.1613            | 27.9642            |
| 30.5188            | 18.1252            | 14.4099            | 30.7247            |

**Table S8** Experimental binodal curve mass fraction data for the system  
[C<sub>4</sub>mim][CF<sub>3</sub>SO<sub>3</sub>] (1) + D-maltitol (2) + H<sub>2</sub>O (3) at 298 K

| D-maltitol         |                    |                    |                    |
|--------------------|--------------------|--------------------|--------------------|
| 100 w <sub>1</sub> | 100 w <sub>2</sub> | 100 w <sub>1</sub> | 100 w <sub>2</sub> |
| 54.8079            | 7.8548             | 31.0797            | 16.0088            |
| 51.9000            | 8.4511             | 30.6071            | 16.4065            |
| 49.9130            | 9.1633             | 30.0629            | 16.7562            |
| 48.2806            | 9.7058             | 29.0169            | 17.2683            |
| 46.8608            | 10.2044            | 28.4283            | 17.5061            |
| 45.2655            | 10.9138            | 27.8844            | 17.7498            |
| 43.4272            | 11.5069            | 27.1153            | 18.3293            |
| 41.6827            | 11.9421            | 25.9676            | 19.0724            |
| 40.5688            | 12.4437            | 24.8538            | 19.7420            |
| 39.4314            | 12.9004            | 23.7822            | 20.2202            |
| 38.4387            | 13.2785            | 22.7888            | 20.8741            |
| 37.2271            | 13.7001            | 21.9097            | 21.3121            |
| 36.2492            | 14.2311            | 21.0976            | 21.9887            |
| 35.0775            | 14.5263            | 19.9741            | 22.9473            |
| 33.5786            | 15.2078            | 18.5042            | 24.3256            |
| 32.7302            | 15.6428            | 17.5070            | 25.4455            |
| 32.0381            | 15.8854            |                    |                    |

**Table S9** Density of each aqueous rich phase at a ternary composition of 40 wt % of [C<sub>4</sub>mim][CF<sub>3</sub>SO<sub>3</sub>] and 25 wt % of each carbohydrate (CH) in the temperature range between (298.15 and 318.15) K

| T / K  | sucrose<br>( $\rho / \text{g}\cdot\text{cm}^{-3}$ ) |                      | D-(+)-glucose<br>( $\rho / \text{g}\cdot\text{cm}^{-3}$ ) |                      | D-(-)-fructose<br>( $\rho / \text{g}\cdot\text{cm}^{-3}$ ) |                      | D-(+)-mannose<br>( $\rho / \text{g}\cdot\text{cm}^{-3}$ ) |                      | D-(+)-xylose<br>( $\rho / \text{g}\cdot\text{cm}^{-3}$ ) |                      | D-maltitol<br>( $\rho / \text{g}\cdot\text{cm}^{-3}$ ) |                      | D-sorbitol<br>( $\rho / \text{g}\cdot\text{cm}^{-3}$ ) |                      | xylitol<br>( $\rho / \text{g}\cdot\text{cm}^{-3}$ ) |                      |
|--------|-----------------------------------------------------|----------------------|-----------------------------------------------------------|----------------------|------------------------------------------------------------|----------------------|-----------------------------------------------------------|----------------------|----------------------------------------------------------|----------------------|--------------------------------------------------------|----------------------|--------------------------------------------------------|----------------------|-----------------------------------------------------|----------------------|
|        | IL-rich<br>phase                                    | CH-<br>rich<br>phase | IL-rich<br>phase                                          | CH-<br>rich<br>phase | IL-rich<br>phase                                           | CH-<br>rich<br>phase | IL-rich<br>phase                                          | CH-<br>rich<br>phase | IL-rich<br>phase                                         | CH-<br>rich<br>phase | IL-rich<br>phase                                       | CH-<br>rich<br>phase | IL-rich<br>phase                                       | CH-<br>rich<br>phase | IL-rich<br>phase                                    | CH-<br>rich<br>phase |
| 298.15 | 1.2234                                              | 1.2247               | 1.2363                                                    | 1.2172               | 1.2335                                                     | 1.2204               | 1.2348                                                    | 1.1824               | 1.2333                                                   | 1.2045               | 1.2261                                                 | 1.2202               | 1.2333                                                 | 1.1929               | 1.2348                                              | 1.1824               |
| 303.15 | 1.2204                                              | 1.2207               | 1.2323                                                    | 1.2144               | 1.2294                                                     | 1.2171               | 1.2306                                                    | 1.1794               | 1.2291                                                   | 1.2014               | 1.2220                                                 | 1.2175               | 1.2291                                                 | 1.1899               | 1.2306                                              | 1.1794               |
| 308.15 | 1.2175                                              | 1.2167               | 1.2282                                                    | 1.2117               | 1.2254                                                     | 1.2137               | 1.2265                                                    | 1.1763               | 1.2251                                                   | 1.1984               | 1.2180                                                 | 1.2147               | 1.2251                                                 | 1.1870               | 1.2265                                              | 1.1763               |
| 313.15 | 1.2146                                              | 1.2126               | 1.2242                                                    | 1.2089               | 1.2214                                                     | 1.2102               | 1.2224                                                    | 1.1732               | 1.2209                                                   | 1.1953               | 1.2140                                                 | 1.2118               | 1.2209                                                 | 1.1840               | 1.2224                                              | 1.1732               |
| 318.15 | 1.2115                                              | 1.2086               | 1.2201                                                    | 1.2059               | 1.2173                                                     | 1.2067               | 1.2182                                                    | 1.1700               | 1.2168                                                   | 1.1921               | 1.2099                                                 | 1.2087               | 1.2168                                                 | 1.1809               | 1.2182                                              | 1.1700               |

**Table S10** Viscosity of each aqueous rich phase at a ternary composition of 40 wt % of [C<sub>4</sub>mim][CF<sub>3</sub>SO<sub>3</sub>] and 25 wt % of each carbohydrate (CH) in the temperature range between (298.15 and 318.15) K

| T / K  | sucrose                            |               | D-(+)-glucose                      |               | D-(-)-fructose                     |               | D-(+)-mannose                      |               | D-(+)-xylose                       |               | D-maltitol                         |               | xylitol                            |               | D-sorbitol                         |               |
|--------|------------------------------------|---------------|------------------------------------|---------------|------------------------------------|---------------|------------------------------------|---------------|------------------------------------|---------------|------------------------------------|---------------|------------------------------------|---------------|------------------------------------|---------------|
|        | $(\eta / \text{mPa}\cdot\text{s})$ |               | $(\eta / \text{mPa}\cdot\text{s})$ |               | $(\eta / \text{mPa}\cdot\text{s})$ |               | $(\eta / \text{mPa}\cdot\text{s})$ |               | $(\eta / \text{mPa}\cdot\text{s})$ |               | $(\eta / \text{mPa}\cdot\text{s})$ |               | $(\eta / \text{mPa}\cdot\text{s})$ |               | $(\eta / \text{mPa}\cdot\text{s})$ |               |
|        | IL-rich phase                      | CH-rich phase |
| 298.15 | 8.3799                             | 13.763        | 9.8116                             | 9.0652        | 11.094                             | 8.8939        | 9.7071                             | 6.9634        | 9.1772                             | 7.6858        | 8.5738                             | 12.975        | 9.1772                             | 8.2700        | 9.7071                             | 6.9634        |
| 303.15 | 7.0285                             | 11.186        | 8.2138                             | 7.4783        | 9.1491                             | 7.2665        | 8.0830                             | 5.7907        | 7.7225                             | 6.2694        | 7.2426                             | 10.548        | 7.7225                             | 6.8210        | 8.0830                             | 5.7907        |
| 308.15 | 5.9913                             | 9.1988        | 6.9806                             | 6.2632        | 7.5672                             | 5.9832        | 6.8891                             | 4.8867        | 6.6157                             | 5.2898        | 6.1953                             | 8.7241        | 6.6157                             | 5.7064        | 6.8891                             | 4.8867        |
| 313.15 | 5.1862                             | 7.6107        | 6.0107                             | 5.314         | 6.2654                             | 5.0344        | 5.9525                             | 4.1773        | 5.7345                             | 4.5219        | 5.3507                             | 7.3058        | 5.7345                             | 4.8368        | 5.9525                             | 4.1773        |
| 318.15 | 4.5327                             | 6.3207        | 5.2334                             | 4.5414        | 5.2341                             | 4.3142        | 5.1887                             | 3.6099        | 5.0057                             | 3.915         | 4.6529                             | 6.1943        | 5.0057                             | 4.1483        | 5.1887                             | 3.6099        |

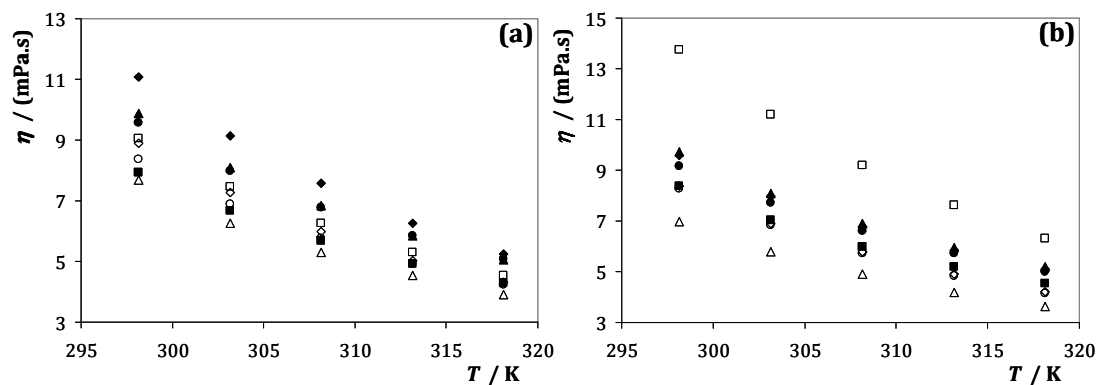

**Fig. S3** Experimental viscosity ( $\eta$ ) as a function of temperature for the IL-rich phase (full symbols) and carbohydrate-rich phase (empty symbols). **(a)**: ( $\square$ ) D-(+)-glucose; ( $\diamond$ ) D-(-)-fructose; ( $\circ$ ) D-(+)-mannose; ( $\triangle$ ) D-(+)-xylose; **(b)**: ( $\square$ ) sucrose; ( $\diamond$ ) D-maltitol; ( $\circ$ ) D-sorbitol; ( $\triangle$ ) xylitol.

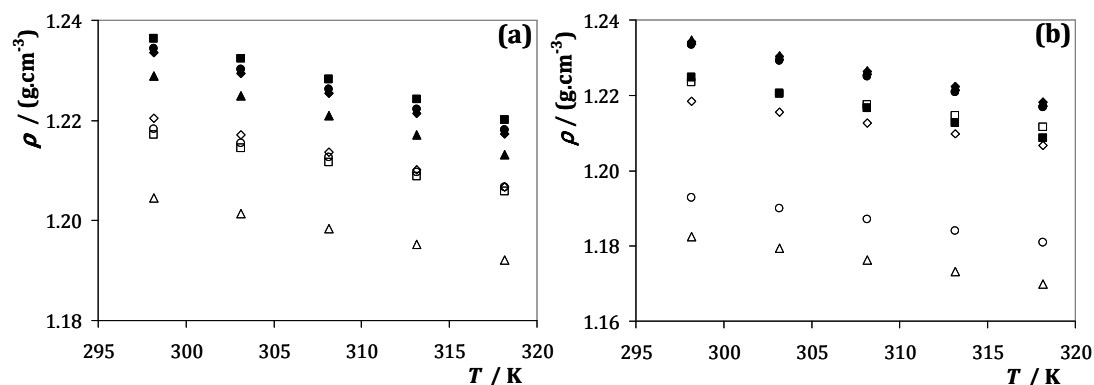

**Fig. S4** Experimental density ( $\rho$ ) as a function of temperature for the IL-rich phase (full symbols) and carbohydrate-rich phase (empty symbols). **(a)**: ( $\square$ ) D-(+)-glucose; ( $\diamond$ ) D-(-)-fructose; ( $\circ$ ) D-(+)-mannose; ( $\triangle$ ) D-(+)-xylose; **(b)**: ( $\square$ ) sucrose; ( $\diamond$ ) D-maltitol; ( $\circ$ ) D-sorbitol; ( $\triangle$ ) xylitol.

**Table S11** Partition coefficients of L-tryptophan, caffeine and  $\beta$ -carotene (and respective standard deviations,  $\sigma$ ) and mass fraction compositions of the ternary mixture at 298 K

| Carbohydrate      | Mass fraction composition / wt % |       | $K \pm \sigma$  |
|-------------------|----------------------------------|-------|-----------------|
|                   | IL                               | CH    |                 |
| L-tryptophan      |                                  |       |                 |
| sucrose           | 39.93                            | 25.04 | $1.13 \pm 0.02$ |
| D-(+)-glucose     | 40.11                            | 24.94 | $1.06 \pm 0.04$ |
| D-(-)-fructose    | 39.98                            | 24.97 | $1.08 \pm 0.02$ |
| D-(+)-mannose     | 39.84                            | 24.91 | $1.08 \pm 0.04$ |
| D-(+)-xylose      | 40.08                            | 24.93 | $1.19 \pm 0.04$ |
| D-maltitol        | 40.00                            | 24.99 | $1.06 \pm 0.01$ |
| xylitol           | 39.82                            | 24.89 | $1.06 \pm 0.05$ |
| D-sorbitol        | 39.98                            | 24.97 | $1.13 \pm 0.06$ |
| caffeine          |                                  |       |                 |
| sucrose           | 39.95                            | 24.97 | $2.19 \pm 0.06$ |
| D-(+)-glucose     | 40.01                            | 25.02 | $2.57 \pm 0.01$ |
| D-(-)-fructose    | 40.03                            | 24.97 | $2.68 \pm 0.09$ |
| D-(+)-mannose     | 40.01                            | 24.93 | $2.15 \pm 0.03$ |
| D-(+)-xylose      | 39.87                            | 24.89 | $1.50 \pm 0.07$ |
| D-maltitol        | 39.95                            | 25.02 | $2.89 \pm 0.09$ |
| xylitol           | 40.06                            | 24.96 | $2.80 \pm 0.02$ |
| D-sorbitol        | 39.97                            | 25.01 | $3.37 \pm 0.01$ |
| $\beta$ -carotene |                                  |       |                 |
| sucrose           | 40.09                            | 25.06 | $12.5 \pm 0.6$  |
| D-(+)-glucose     | 40.05                            | 24.89 | $10.0 \pm 0.8$  |
| D-(-)-fructose    | 39.87                            | 24.95 | $9.3 \pm 0.4$   |
| D-(+)-mannose     | 39.97                            | 24.87 | $7.9 \pm 0.5$   |
| D-(+)-xylose      | 39.62                            | 24.71 | $5.5 \pm 0.2$   |
| D-maltitol        | 39.99                            | 25.02 | $24.0 \pm 0.4$  |
| xylitol           | 39.95                            | 25.02 | $20.0 \pm 0.7$  |
| D-sorbitol        | 40.01                            | 24.97 | $20.5 \pm 0.9$  |

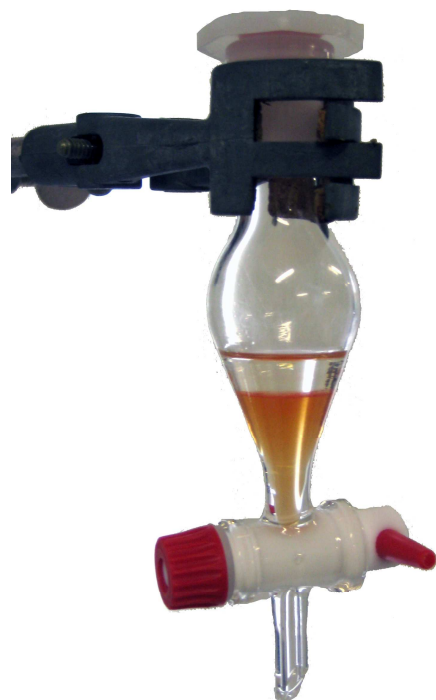

**Fig. S5** Macroscopic evidence for the preferential partitioning of  $\beta$ -carotene for the bottom  $[\text{C}_4\text{mim}][\text{CF}_3\text{SO}_3]$ -rich phase (40 wt % of  $[\text{C}_4\text{mim}][\text{CF}_3\text{SO}_3]$  + 25 wt % of D-maltitol + 35 wt % of water).
